# Supplementary material for: Diagnostic utility of CSF α-synuclein species in Parkinson's disease: protocol for a systematic review and meta-analysis
Source: PubMed Central journal article supplement — BMJ Open. 2016 Jun 13;6(6):e011113. doi: 10.1136/bmjopen-2016-011113 (PMC4916700; doi:10.1136/bmjopen-2016-011113), 2016-06-13
Supplement: bmjopen-2016-011113supp_appendix1.pdf [file bmjopen-2016-011113supp_appendix1.pdf]

## **Appendix 1 – Search strategy**

### **Pubmed**

(synuclein[Title/Abstract] OR alpha-synuclein[Title/Abstract] OR SNCA[Title/Abstract] OR "Synucleins"[Mesh])

AND

(spinal fluid[Title/Abstract] OR cerebro spinal fluid[Title/Abstract] OR cerebrospinal fluid[Title/Abstract] OR cerebral spinal fluid[Title/Abstract] OR csf[Title/Abstract] OR "Cerebrospinal Fluid"[Mesh])

AND

(parkinson\*[Title/Abstract] OR pd[Title/Abstract] OR parkinson disease OR "Parkinson Disease"[Mesh] )

### **Embase**

synuclein:ab,ti OR 'synuclein'/exp OR 'alpha-synuclein':ab,ti 'alpha-synuclein'/exp OR snca:ab,ti OR 'snca'/exp

AND

('spinal fluid':ab,ti OR 'spinal fluid'/exp OR 'cerebro spinal fluid':ab,ti OR 'cerebro spinal fluid'/exp OR 'cerebrospinal fluid':ab,ti OR 'cerebrospinal fluid'/exp OR csf:ab,ti OR csf/exp)

AND

(parkinson\*:ab,ti OR 'Parkinson'/exp OR pd:ab,ti)
