# Supplementary material for: Diagnostic utility of CSF α-synuclein species in Parkinson's disease: protocol for a systematic review and meta-analysis
Source: PubMed Central journal article supplement — BMJ Open. 2016 Jun 13;6(6):e011113. doi: 10.1136/bmjopen-2016-011113 (PMC4916700; doi:10.1136/bmjopen-2016-011113), 2016-06-13
Supplement: bmjopen-2016-011113supp_appendix2.pdf [file bmjopen-2016-011113supp_appendix2.pdf]

**Appendix 2** - The QUADAS-2 tool.

| <b>Domain</b>                                              | <b>Patient selection</b>                                                                                                                                                                                            | <b>Index test</b>                                                                                                                                                                                                                                                                                                                                                    | <b>Reference standard</b>                                                                                                                                                                                                                       | <b>Flow and timing</b>                                                                                                                                                                                                                                                                                                |
|------------------------------------------------------------|---------------------------------------------------------------------------------------------------------------------------------------------------------------------------------------------------------------------|----------------------------------------------------------------------------------------------------------------------------------------------------------------------------------------------------------------------------------------------------------------------------------------------------------------------------------------------------------------------|-------------------------------------------------------------------------------------------------------------------------------------------------------------------------------------------------------------------------------------------------|-----------------------------------------------------------------------------------------------------------------------------------------------------------------------------------------------------------------------------------------------------------------------------------------------------------------------|
| <b>Description</b>                                         | Describe methods of patient selection.<br>Describe included patients (prior testing, presentation, intended use of index test and setting).                                                                         | Describe the index test and how it was conducted and interpreted.                                                                                                                                                                                                                                                                                                    | Describe the reference standard and how it was conducted and interpreted.                                                                                                                                                                       | Describe any patients who did not receive the index test(s) and/or reference standard or who were excluded from the 2x2 table (refer to flow diagram).<br>Describe the time interval and any interventions between index test(s) and reference standard.                                                              |
| <b>Signalling questions (yes/no/unclear)</b>               | <ul style="list-style-type: none"> <li>- Was a consecutive or random sample of patients enrolled?</li> <li>- Did the study avoid inappropriate exclusions?</li> <li>- Was a case-control design avoided?</li> </ul> | <ul style="list-style-type: none"> <li>- Were the index test results interpreted without knowledge of the results of the reference standard?</li> <li>- Were the methods for CSF collection and handling appropriately described?</li> <li>- Do the he study forecasts the exclusion of blood-contaminated samples on the basis of an accurate cut – off?</li> </ul> | <ul style="list-style-type: none"> <li>- Is the reference standard likely to correctly classify the target condition?</li> <li>- Were the reference standard results interpreted without knowledge of the results of the index test?</li> </ul> | <ul style="list-style-type: none"> <li>- Was there an appropriate interval between index test(s) and reference standard?</li> <li>- Did all patients receive a reference standard?</li> <li>- Did all patients receive the same reference standard?</li> <li>- Were all patients included in the analysis?</li> </ul> |
| <b>Concerns regarding applicability: High/low/ unclear</b> | Are there concerns that the included patients do not match the review question?                                                                                                                                     | Are there concerns that the index test, its conduct, or interpretation differs from the review question?                                                                                                                                                                                                                                                             | Are there concerns that the target condition as defined by the reference standard does not match the review question?                                                                                                                           |                                                                                                                                                                                                                                                                                                                       |
